# Supplementary material for: Enhanced Cytotoxicity and Antimelanoma Activity of Novel Semisynthetic Derivatives of Betulinic Acid with Indole Conjugation
Source: MDPI journal article supplement (doi:10.3390/plants13010036), 2023-12-21
Supplement: s1 [file s1]

## Results

### Anti-Migratory Activity Evaluation Employing the Scratch Assay Method

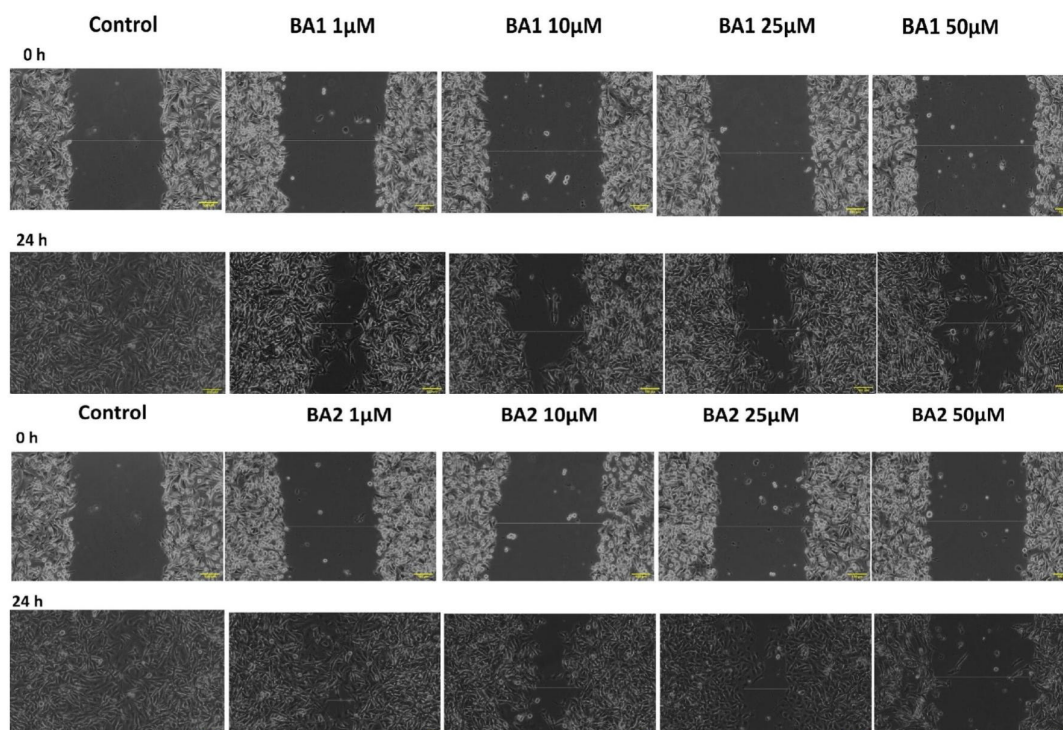

Figure S1. Anti-migratory activity of BA1 and BA2.

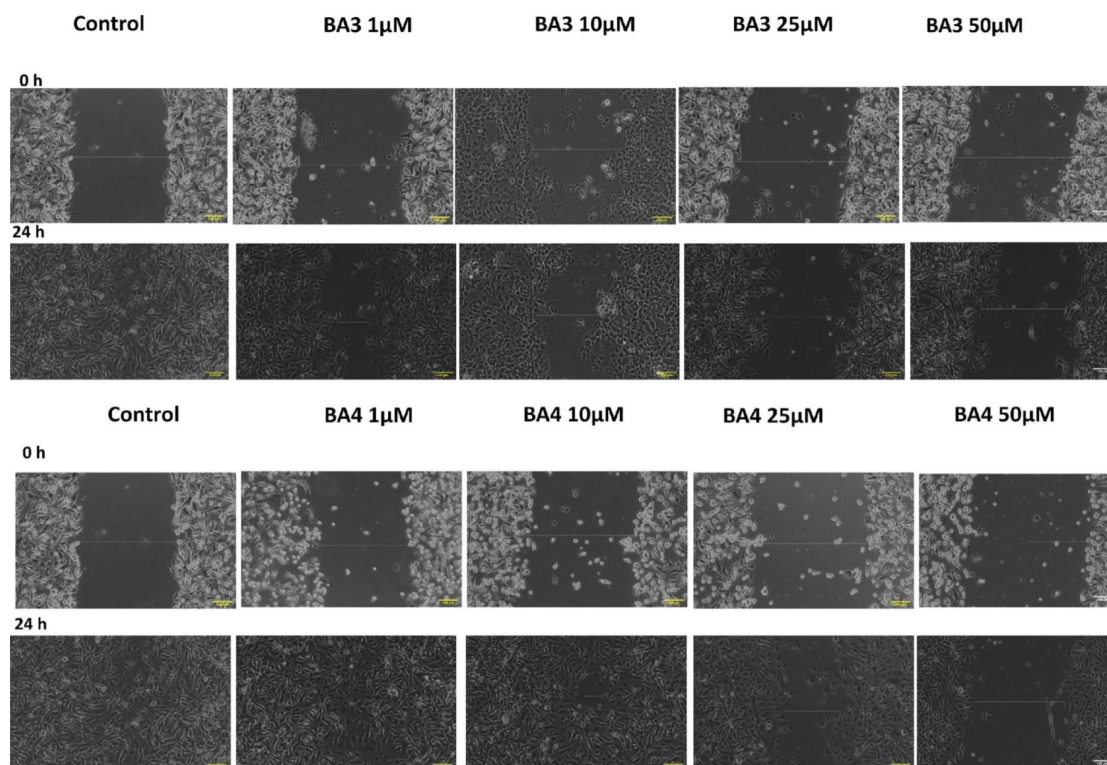

Figure S2. Anti-migratory activity of BA3 and BA4.

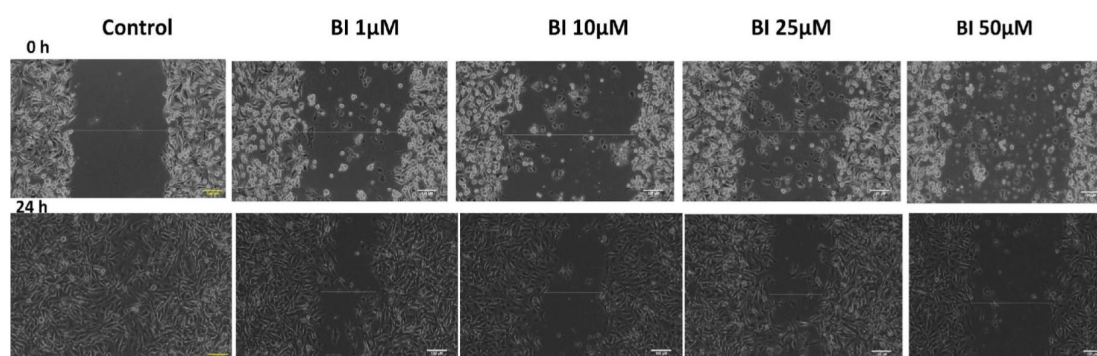

**Figure S3.** Anti-migratory activity of BI.
